# Supplementary material for: Status of nutrients important in brain function in phenylketonuria: a systematic review and meta-analysis
Source: Springer Nature journal article supplement (doi:10.1186/s13023-018-0839-x), 2018-06-25
Supplement: MOESM2 [file 15882338]

| Study                | PKU  |      |            | Control |       |            | Hedges-smd | Lower CL | Upper CL | Weight (%) |
|----------------------|------|------|------------|---------|-------|------------|------------|----------|----------|------------|
|                      | Mean | SD   | N          | Mean    | SD    | N          |            |          |          |            |
| Colomé 2003, Spain   | 1.48 | 0.75 | 58         | 1.4     | 0.425 | 58         | 0.130      | -0.234   | 0.495    | 32.4%      |
| Mikołuc 2012, Poland | 3.36 | 2.11 | 99         | 2.74    | 1.93  | 62         | 0.302      | -0.017   | 0.621    | 42.2%      |
| Yang 2009, China     | 0.83 | 0.21 | 34         | 0.92    | 0.31  | 70         | -0.317     | -0.729   | 0.095    | 25.3%      |
| <b>Total</b>         |      |      | <b>191</b> |         |       | <b>190</b> |            |          |          |            |

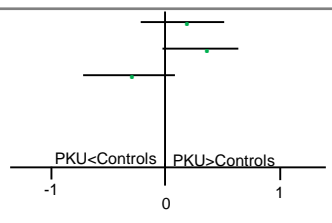

**Total Number of subjects:** 381 (PKU= 191 , Controls= 190)  
**Heterogeneity:** Tau<sup>2</sup>= 0.062, I<sup>2</sup>= 64%
