# Supplementary material for: Status of nutrients important in brain function in phenylketonuria: a systematic review and meta-analysis
Source: Springer Nature journal article supplement (doi:10.1186/s13023-018-0839-x), 2018-06-25
Supplement: MOESM4 [file 15882338]

| Study                 | PKU  |      |           | Control |      |           | Hedges-smd | Lower CL | Upper CL | Weight (%) |
|-----------------------|------|------|-----------|---------|------|-----------|------------|----------|----------|------------|
|                       | Mean | SD   | N         | Mean    | SD   | N         |            |          |          |            |
| Prince 1994, USA      | 99.4 | 54.0 | 15        | 53.5    | 21.3 | 6         | 0.925      | -0.062   | 1.913    | 20.2%      |
| Schulpis 2002, Greece | 36.7 | 7.24 | 74        | 60.2    | 10   | 50        | -2.761     | -3.258   | -2.265   | 79.8%      |
| <b>Total</b>          |      |      | <b>89</b> |         |      | <b>56</b> |            |          |          |            |

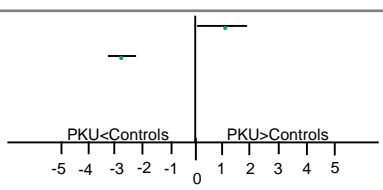

Total Number of subjects: 145 (PKU= 89 , Controls= 56)  
Heterogeneity: Tau<sup>2</sup>= 6.637, I<sup>2</sup>= 98%
