# Supplementary material for: Status of nutrients important in brain function in phenylketonuria: a systematic review and meta-analysis
Source: Springer Nature journal article supplement (doi:10.1186/s13023-018-0839-x), 2018-06-25
Supplement: MOESM5 [file 15882338]

| Study                   | PKU   |      |           | Control |      |           | Hedges-smd | Lower CL | Upper CL | Weight (%) |
|-------------------------|-------|------|-----------|---------|------|-----------|------------|----------|----------|------------|
|                         | Mean  | SD   | N         | Mean    | SD   | N         |            |          |          |            |
| Galli 1991, Italy       | 169   | 27   | 15        | 189     | 28   | 12        | -0.707     | -1.489   | 0.075    | 58.3%      |
| Pietz 2003, Switzerland | 115.6 | 8.88 | 11        | 126.1   | 8.58 | 10        | -1.153     | -2.078   | -0.229   | 41.7%      |
| <b>Total</b>            |       |      | <b>26</b> |         |      | <b>22</b> |            |          |          |            |

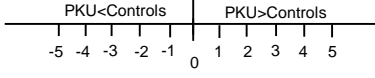

Total Number of subjects: 48 (PKU= 26 , Controls= 22)  
Heterogeneity: Tau<sup>2</sup>= 0.000, I<sup>2</sup>= 0%
