# Supplementary material for: Status of nutrients important in brain function in phenylketonuria: a systematic review and meta-analysis
Source: Springer Nature journal article supplement (doi:10.1186/s13023-018-0839-x), 2018-06-25

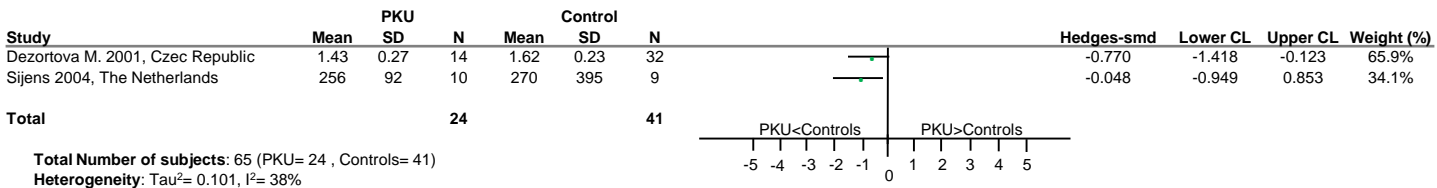

Supplement: MOESM6 [file 15882338]
